# Supplementary material for: Colloidal synthesis and optical properties of type-II CdSe–CdTe and inverted CdTe–CdSe core–wing heteronanoplatelets
Source: Royal Society of Chemistry journal article supplement (doi:10.1039/c4nr07134d), 2015-01-01
Supplement: c4nr07134d1.pdf [file c4nr07134d1.pdf]

## Electronic Supplementary Information

# Colloidal synthesis and optical properties of type-II CdSe-CdTe and inverted CdTe-CdSe core-wings heteronanoplatelets

A. V. Antanovich,<sup>a</sup> A. V. Prudnikau,<sup>a</sup> D. Melnikau,<sup>b</sup> Y. P. Rakovich,<sup>b,c</sup> A. Chuvilin,<sup>c,d</sup> U. Woggon,<sup>e</sup> A. W. Achtstein<sup>e</sup> and M. V. Artemyev<sup>a\*</sup>

<sup>a</sup> Institute for Physico-Chemical Problems, Belarusian State University, Leningradskaya str., 14, Minsk 220030, Belarus

<sup>b</sup> Centro de Física de Materiales (CSIC-UPV-EHU) and Donostia International Physics Center (DIPC), E-20018 Donostia-San Sebastian, Spain

<sup>c</sup> Ikerbasque, Basque Foundation for Science, 48011 Bilbao, Spain

<sup>d</sup> CIC nanoGUNE, Tolosa Hiribidea, 76, E-20018 Donostia – San Sebastian, Spain

<sup>e</sup> Institute of Optics and Atomic Physics, Technical University of Berlin, Strasse des 17. Juni 135, 10623 Berlin, Germany

\*E-mail: [m\\_artemyev@yahoo.com](mailto:m_artemyev@yahoo.com)

### Quantum yield determination

The fluorescence quantum yield of type-II CdSe/CdTe nanoplatelets was determined using the dye Rhodamine 6G dissolved in ethanol as a reference and calculated in accordance with the expression:

$$\Phi_{NPLs} = \Phi_{Dye} \frac{I_{NPLs} OD_{Dye} n_{NPLs}^2}{I_{Dye} OD_{NPLs} n_{Dye}^2}$$

where  $QY_{Dye}$  is the Rhodamine 6G quantum yield ( $\Phi=0.94^1$ );  $I_{NPLs}$ ,  $I_{Dye}$  the integrated intensities of the NPLs and dye fluorescence;  $OD_{NPLs}$ ,  $OD_{Dye}$  the optical densities of the NPLs and dye solutions and  $n_{NPLs}$ ,  $n_{Dye}$  the refractive indexes of NPLs and dye solutions respectively.<sup>2</sup> PL measurements for QY determination were conducted upon excitation of NPLs and dye solutions at 510 nm.

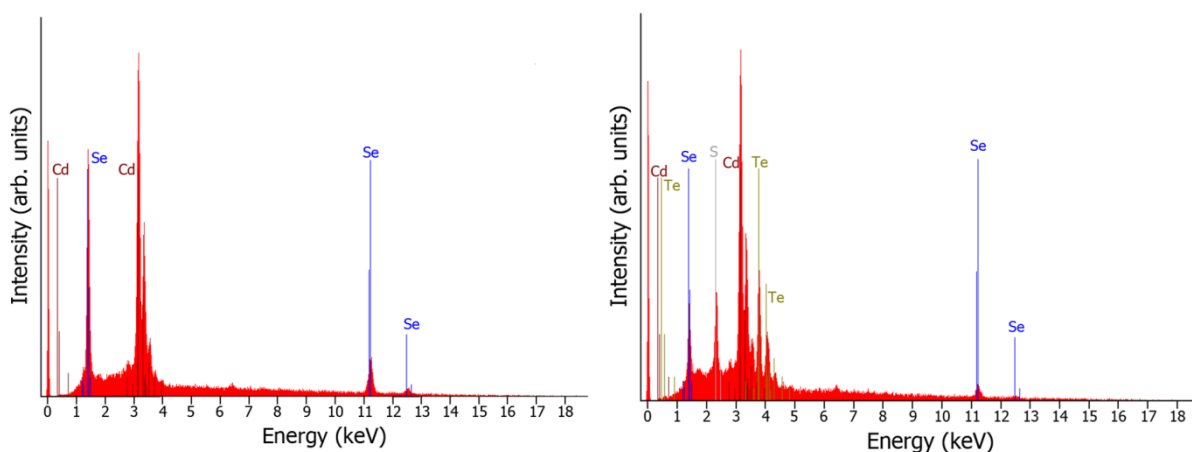

**Figure S1.** EDX spectra of the CdSe core (left) and CdSe-CdTe core-wings NPLs (right). It can be clearly seen that after the formation of a CdTe shell the signal from Te appears.

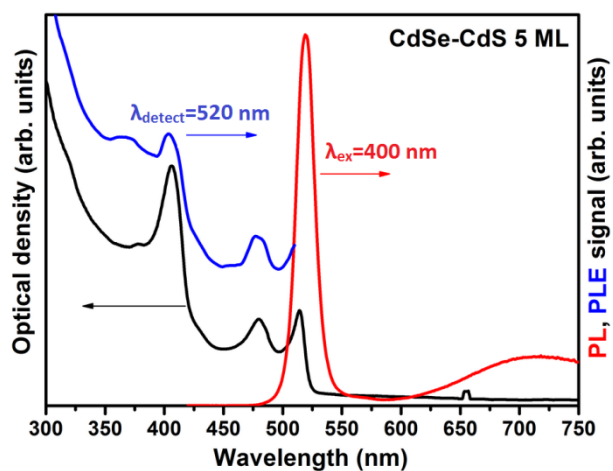

**Figure S2.** Optical absorption (black), PL (red) and PLE spectra (blue) of type-I CdSe(core)-CdS(wings) heteronanostructure.

## REFERENCES

1. A. M. Brouwer, *Pure Appl. Chem.*, 2011, **83**, 2213.
2. M. Grabolle, M. Spieles, V. Lesnyak, N. Gaponik, A. Eychmüller and U. Resch-Genger, *Anal. Chem.*, 2009, **81**, 6285.
